# Supplementary material for: Airborne measurement of peroxy radicals using chemical amplificationcoupled with cavity ring down spectroscopy: the PeRCEAS instrument
Source: Copernicus journal article supplement (doi:10.5194/amt-2019-359), 2019-10-14
Supplement: Supplementary file [file amt-2019-359-AC3-supplement.pdf]

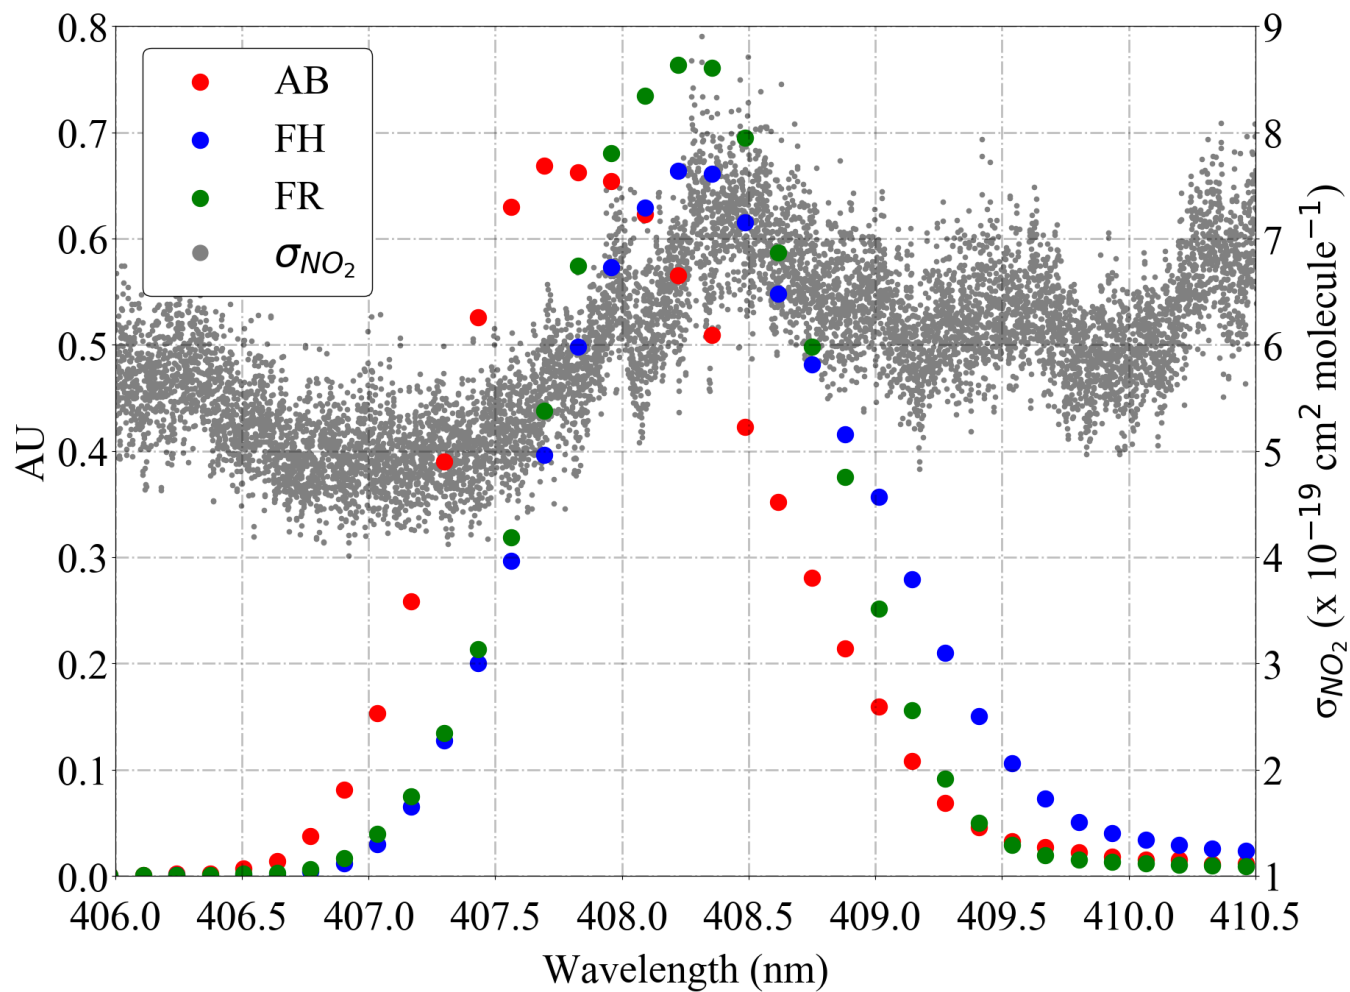

Figure SI-1: Emission spectrum of the lasers used in the PeRCEAS detectors: AB, FH, and FR. The high resolution  $\sigma_{NO_2}$  at 294 K from Vandaele et al (2002) is also depicted for comparison.

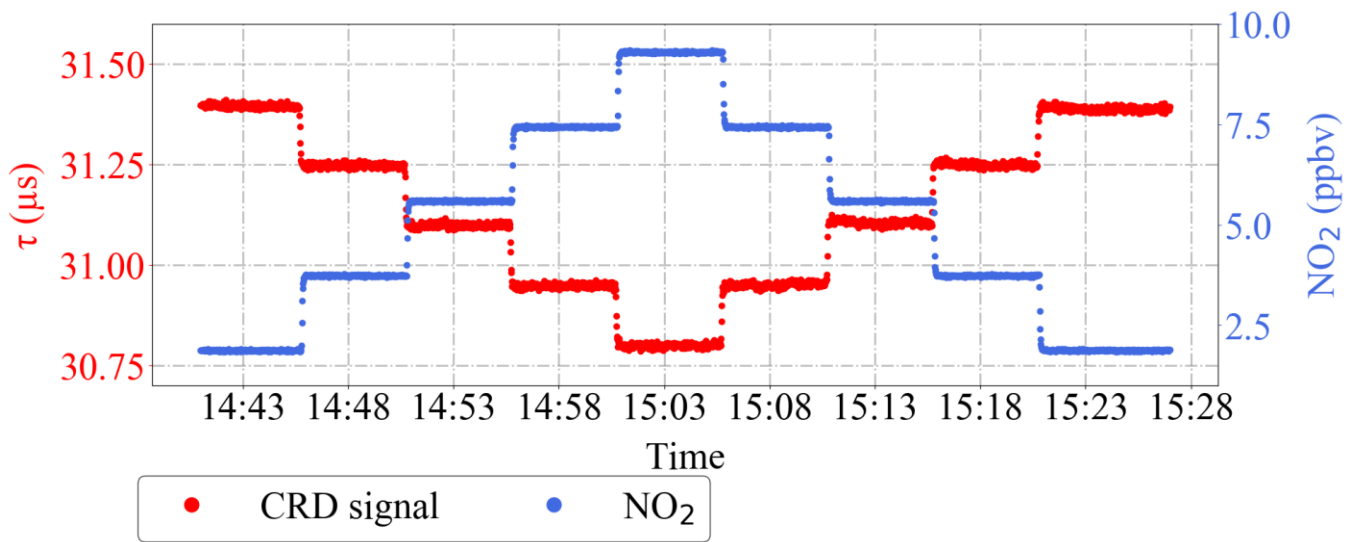

Figure SI-2: PerCEAS measurement of known NO<sub>2</sub> mixing ratios using the FH detector at 200 mbar and 500 ml/min sample flow. The mixing ratios of NO<sub>2</sub> in synthetic air set for the experiment are indicated in blue.”
